# Supplementary material
Source: PubMed Central journal article supplement (PMC4948677)

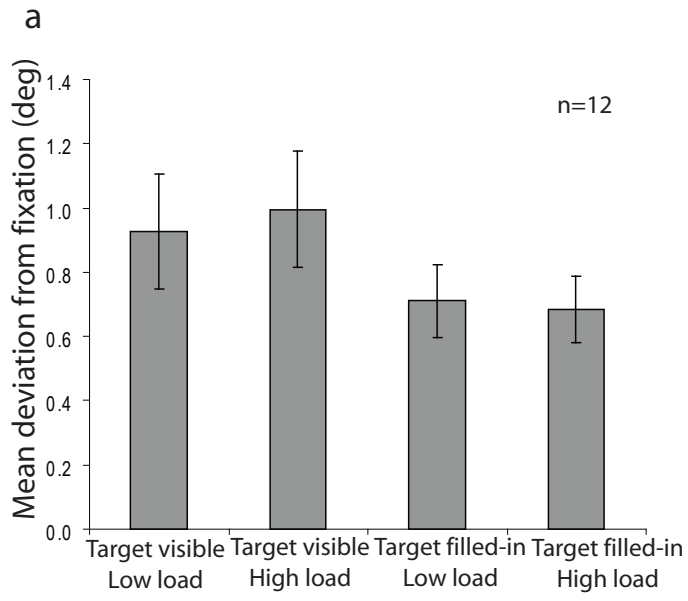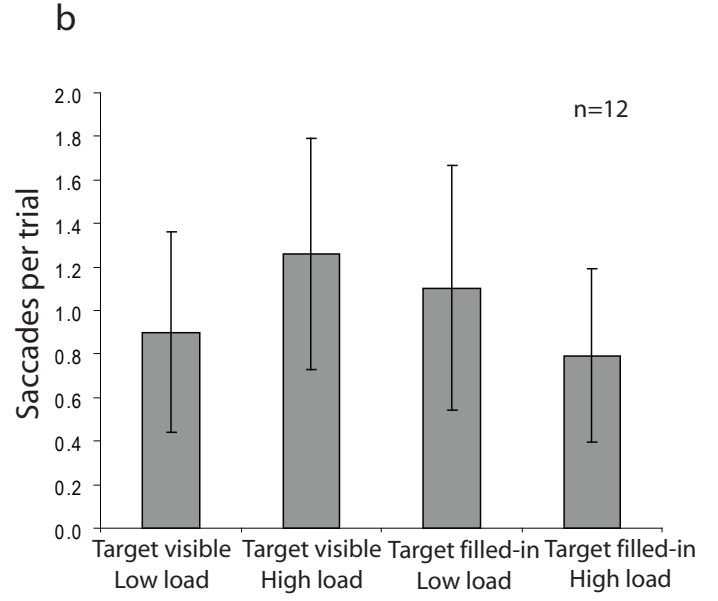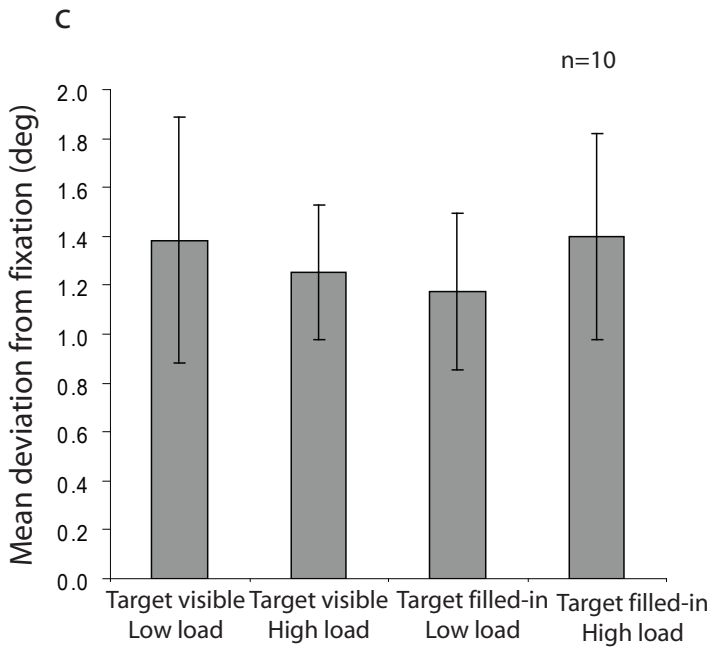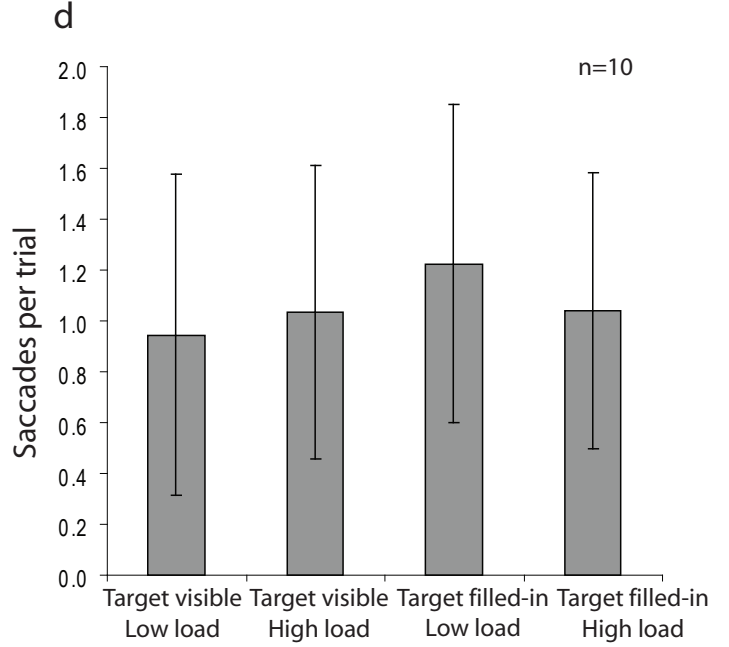

Supplement: NIHMS69101-supplement-Supplementary_Figure_1.pdf [file NIHMS69101-supplement-Supplementary_Figure_1.pdf]
